# Supplementary material
Source: PubMed Central journal article supplement (PMC129709)

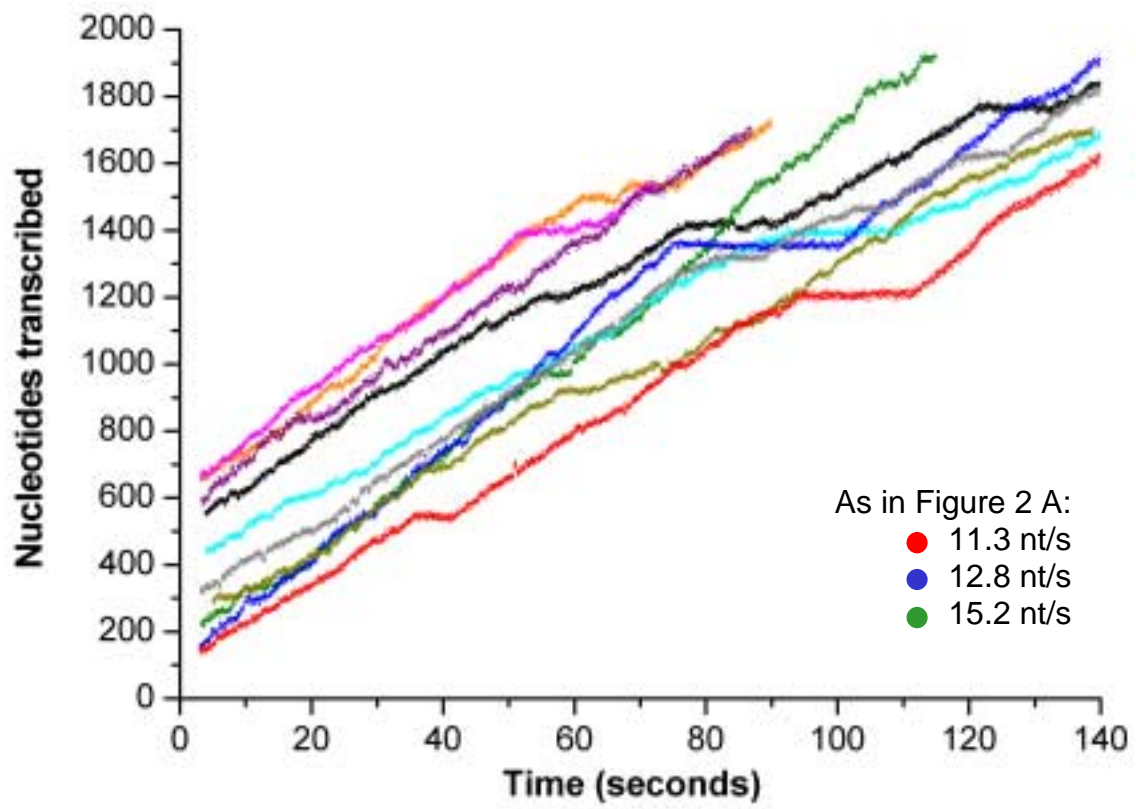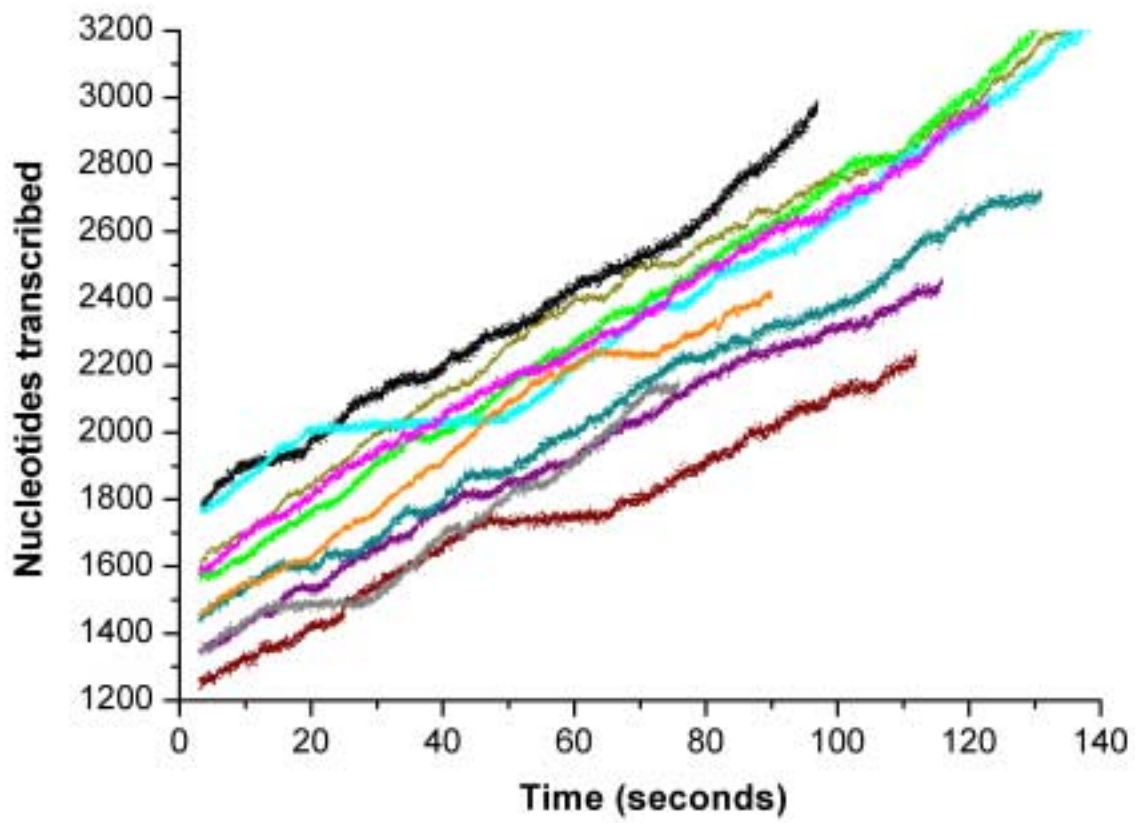

Supplement: pnas_212358999_3.pdf [file pnas_212358999_3.pdf]

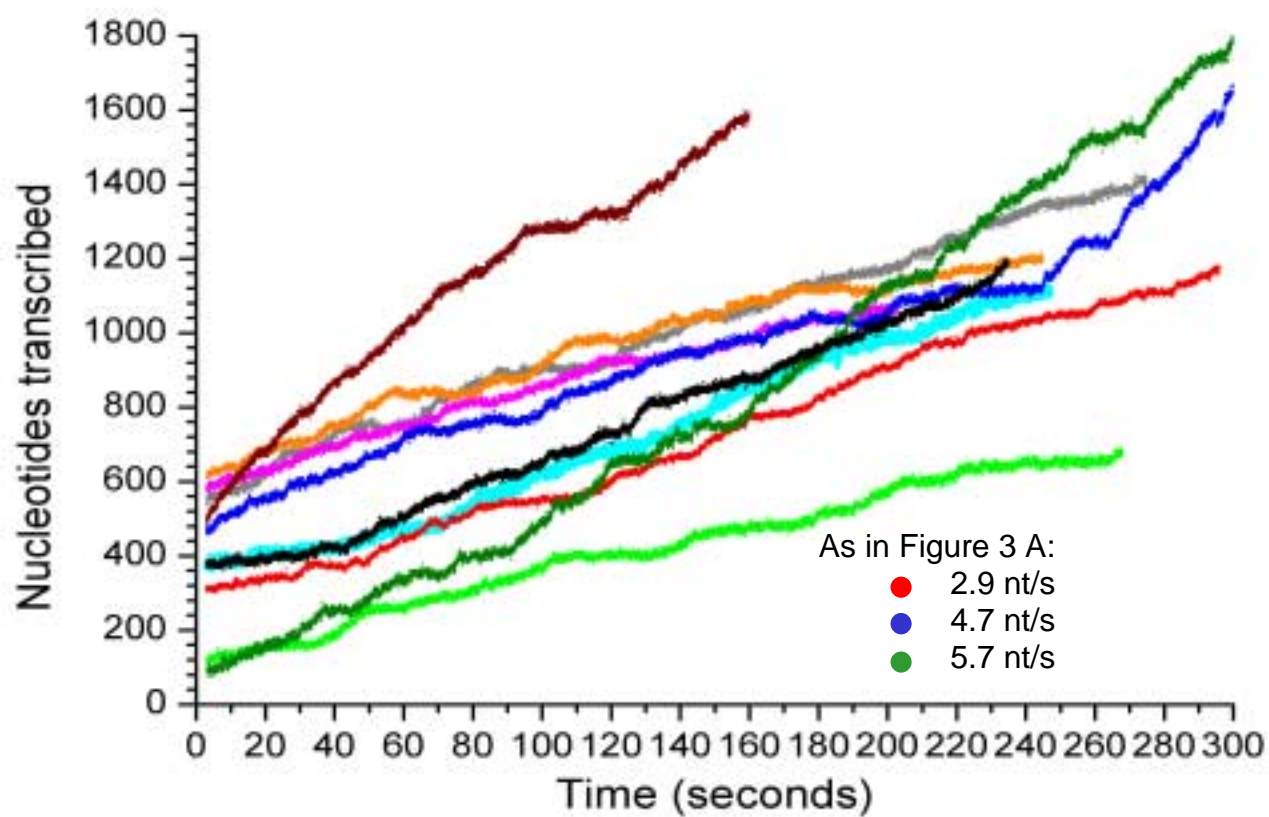

Supplement: pnas_212358999_4.pdf [file pnas_212358999_4.pdf]
